# Supplementary material
Source: PubMed Central journal article supplement (PMC8196244)
Supplement: supplemental_figures_and_legends_bhaa414.pdf [file supplemental_figures_and_legends_bhaa414.pdf]

## Supplemental Figures

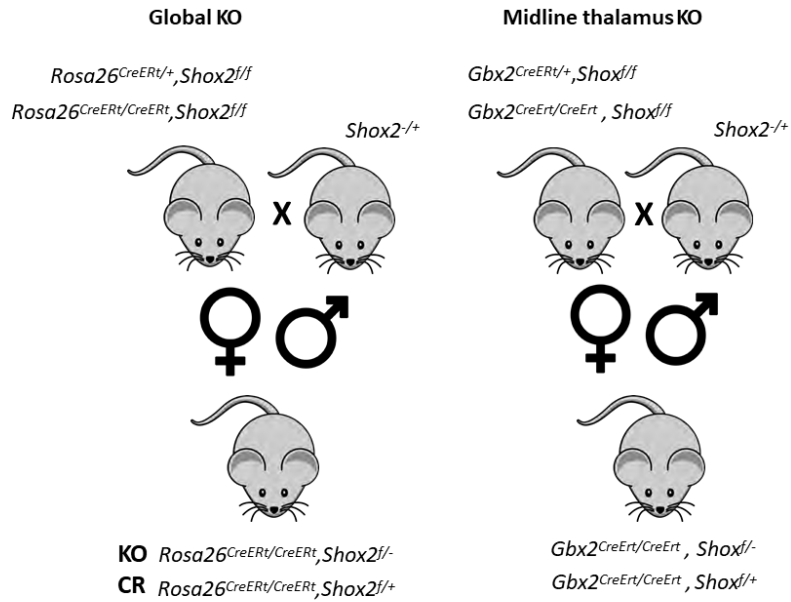

**Supplemental Figure 1.** Schematic diagrams of breeding schemes used to produce  $Rosa26^{CreERT/CreERT}, Shox2^{f/-}$  and  $Gbx2^{CreERT/CreERT}, Shox2^{f/-}$  mice.

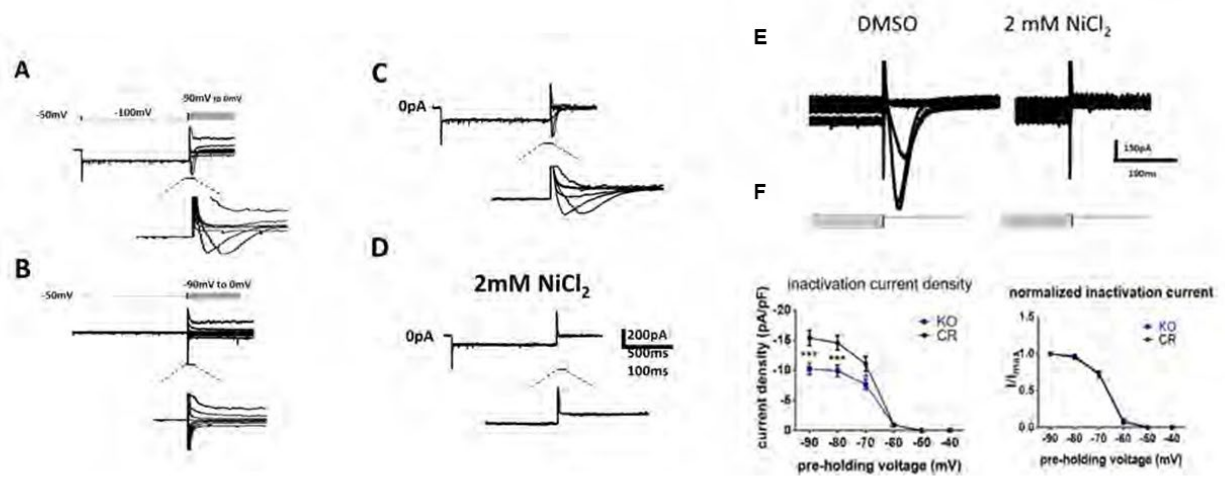

**Supplemental Figure 2. Isolation of T-type  $\text{Ca}^{2+}$  current:** **A.** The membrane potential was hyperpolarized to  $-100\text{mV}$  for  $1\text{s}$  from holding potential  $-50\text{mV}$  to remove inactivation of the T-type calcium current. **B.** T-type calcium currents were elicited by stepping from  $-100\text{mV}$  to a series of incremental depolarizations ranging from  $-90\text{mV}$  to  $0\text{mV}$ . **B.** The same series of step voltages was applied to the same neurons without hyperpolarization to  $-100\text{mV}$ , instead, the membrane potential was held at  $-50\text{mV}$  in that time range. **C.** The T-type calcium currents were isolated by subtracting currents evoked in B from currents evoked in A. **D.** The isolated current was blocked by  $2\text{mM NiCl}_2$ , confirming the isolated current is T-type calcium current. **E.** The T-type calcium currents were elicited at  $-50\text{mV}$  after recovery from  $1\text{s}$  pre-holding step voltage ranging from  $-90\text{mV}$  to  $-40\text{mV}$ . The elicited T-type calcium current is confirmed by application of  $2\text{mM NiCl}_2$  to block it. **F.** The curve of T-type calcium current inactivation current density at different pre-holding voltage from CR neurons and KO neurons. Two-way repeated measures ANOVA indicated significant main effect of genotypes (CR vs KO,  $F_{(1,21)} = 8.41$ ,  $P < 0.01$ ) and voltage ( $F_{(5,105)} = 218.7$ ,  $P < 0.001$ ) and significant interaction ( $F_{(5,105)} = 8.58$ ,  $P < 0.001$ ). **G.** The normalized inactivation current curves of CR and KO neurons are overlapped with each other.

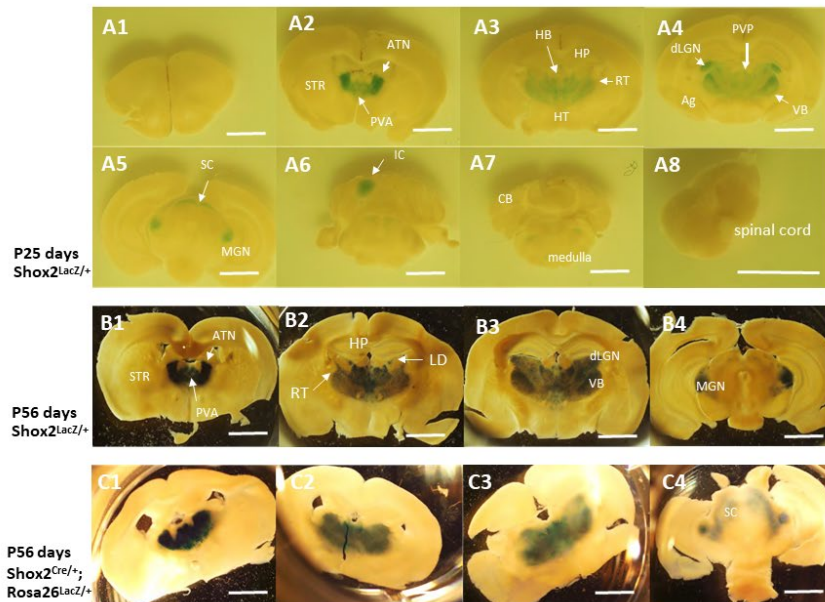

**Supplemental Figure 3. *Shox2* expression is restricted to thalamus in adult and diencephalon throughout development.** Brain sections demonstrating X-gal staining (or *Shox2* expression) results from PND25 (**A1-A8**) and PND56 *Shox2<sup>LacZ/+</sup>* (**B1-B4**) and PND56 male *Shox2<sup>cre/+</sup>*, *Rosa26<sup>LacZ/+</sup>* mouse (**C1-C4**). X-gal staining was observed in anterior thalamus nuclei (ATN), anterior paraventricular nucleus (PVA), ventrobasal thalamus (VB), dorsal lateral geniculate nucleus (dLGN) and medial geniculate nucleus (MGN) but was not observed in the cortex (CX), striatum (STR), hippocampus (HP), amygdala (Ag) or hypothalamus (HT). During development, *Shox2* did express in in habenula (HB), and some areas of the midbrain including superior colliculus (SC) and inferior colliculus (IC), but this expression is reduced in adults. Scale bar: 2 mm.

### A. Control spindle parameters

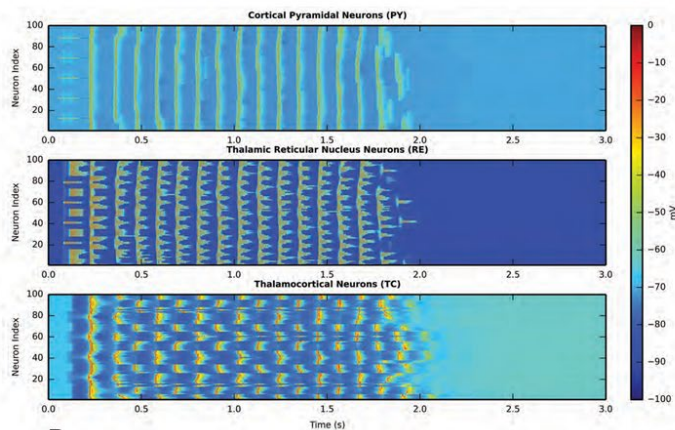

### B. 70% neurons only T-type currents modified

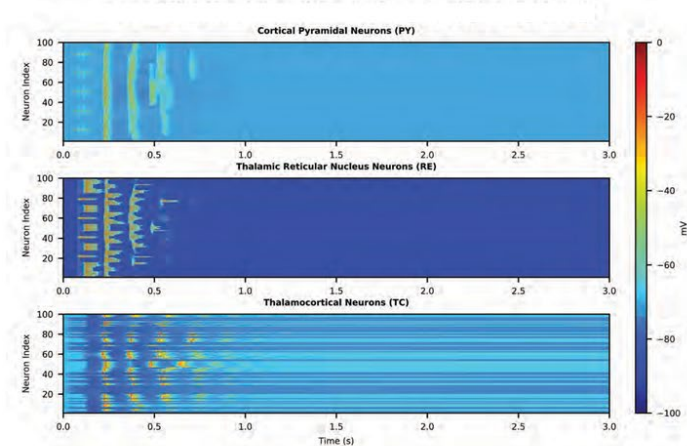

**Supplemental Figure 4. T-type channel alterations alone do not sustain 4Hz absence seizures.**  
**A.** (Same as figure 7A, baseline parameters generating spindle oscillations for comparison) **B.** In 70 random TCNs, T-type activation is shifted from  $-70\text{mV}$  to  $-60\text{mV}$ , HCN is unaffected. Oscillations are not sustained or 4Hz.
